# Supplementary material
Source: publisher figshare collection journal article supplement (https://asha.figshare.com/articles/dataset/_/6170438)
Supplement: Supplementary file 2 [file 1]

Table D.  $R^2$  of individual listener data for both speaker pairs and all morph types in Experiment 2.

|            | P1                |                  |                  |                  |                  | P2               |                   |                  |                   |                   |
|------------|-------------------|------------------|------------------|------------------|------------------|------------------|-------------------|------------------|-------------------|-------------------|
|            | FOFF              | FOFSL            | FOSL             | FFSL             | Full             | FOFF             | FOFSL             | FOSL             | FFSL              | Full              |
| f201       | .99               | .95 <sup>a</sup> | .95              | .97              | .99              | 1.00             | 1.00              | .98 <sup>a</sup> | .88               | 1.00              |
| f202       | .92               | .98              | .87              | .83              | .98              | .98              | .93               | .95              | .74               | .97               |
| f203       | .95               | .99              | .73              | .39 <sup>b</sup> | .98              | .87              | .87               | .93              | .54               | .92               |
| f204       | .63               | .73              | .07 <sup>b</sup> | .82              | .90              | .49 <sup>b</sup> | .65               | .28              | .75               | .74               |
| f206       | 1.00              | .99              | .96              | .82              | .98              | .95              | 1.00 <sup>a</sup> | .99              | .39 <sup>b</sup>  | .99               |
| f207       | .89               | .95              | .96              | .86              | .99              | .92              | .98               | .93              | .75               | .95               |
| f208       | 1.00 <sup>a</sup> | .99 <sup>a</sup> | .98              | .89              | .92 <sup>a</sup> | .99              | .95 <sup>a</sup>  | .94              | 1.00 <sup>a</sup> | 1.00 <sup>a</sup> |
| f209       | .96               | .93              | .85              | .84              | .95              | .92              | .87               | .47 <sup>b</sup> | .74               | .82               |
| m212       | .97               | .98              | 1.00             | .96              | 1.00             | .91              | .91               | .99              | .58               | .99               |
| m213       | .99               | .89              | .88              | .10 <sup>b</sup> | .72              | .98              | .70               | .70              | n.c. <sup>c</sup> | .71               |
| m214       | .98               | .99              | .99              | .89              | .99              | .99              | .95               | .98              | .79 <sup>a</sup>  | .98               |
| m215       | .98               | .96 <sup>a</sup> | .98              | .81              | 1.00             | .98              | .93               | .93              | .55               | .99               |
| m216       | 1.00              | .96              | .96              | .89              | .99              | .88              | .99               | .95              | .59               | .99               |
| m217       | .99               | .99              | .94              | .91              | .99              | .99              | .98               | .93              | .11               | .96               |
| m218       | .98               | .96              | .97              | .93              | .98              | .84              | .97               | .96              | .95               | .94               |
| m219       | .97               | .98              | .97              | .64              | .97              | .90              | .97               | .98              | .62               | .98               |
| <i>M</i>   | .95               | .95              | .88              | .78              | .96              | .91              | .92               | .87              | .67               | .93               |
| <i>SD</i>  | .09               | .07              | .23              | .23              | .07              | .12              | .10               | .21              | .22               | .09               |
| <i>MIN</i> | .63               | .73              | .07              | .10              | .72              | .49              | .65               | .28              | .11               | .71               |
| <i>MAX</i> | 1.00              | .99              | 1.00             | .97              | 1.00             | 1.00             | 1.00              | .99              | 1.00              | 1.00              |
| <i>N</i>   | 16                | 16               | 16               | 16               | 16               | 16               | 16                | 16               | 15                | 16                |

<sup>a</sup>)  $R^2$  result from ambiguous fits; <sup>b</sup>) poor fit ( $R^2 < .5$ ) with corresponding PSE and SD value (not listed) replaced by the mean of listener's data of the appropriate condition for the ANOVA. <sup>c</sup>) One fit computation did not converge.
