# Supplementary material
Source: publisher figshare collection journal article supplement (https://asha.figshare.com/articles/dataset/_/6170438)
Supplement: Supplementary file 3 [file 1]

Table B. Acoustic analysis for /aba/ of single parameter morphs at selected morph level.

|         | ML  | First Vowel |            |            |          |           |                          | Whole Utterance        |                           |             |
|---------|-----|-------------|------------|------------|----------|-----------|--------------------------|------------------------|---------------------------|-------------|
|         |     | F1<br>[Hz]  | F2<br>[Hz] | F3<br>[Hz] | Jit<br>% | Shim<br>% | HNR <sub>v</sub><br>[db] | f <sub>0</sub><br>[Hz] | f <sub>0</sub> SD<br>[Hz] | HNR<br>[db] |
| Full P1 | 0   | 682         | 1136       | 2252       | 0.6      | 4.0       | 15.2                     | 94                     | 9.4                       | 11.0        |
|         | 50  | 814         | 1248       | 2618       | 0.8      | 2.0       | 19.3                     | 149                    | 10.2                      | 16.2        |
|         | 100 | 962         | 1485       | 2828       | 0.8      | 1.0       | 20.3                     | 203                    | 12.7                      | 18.6        |
| Full P2 | 0   | 812         | 1375       | 2519       | 0.7      | 5.0       | 13.9                     | 104                    | 4.7                       | 11.5        |
|         | 50  | 882         | 1531       | 2756       | 0.5      | 2.0       | 17.9                     | 158                    | 4.5                       | 14.6        |
|         | 100 | 971         | 1639       | 2967       | 0.7      | 2.0       | 19.2                     | 213                    | 6.5                       | 15.8        |
| F0 P1   | 0   | 817         | 1318       | 2654       | 0.7      | 2.0       | 15.8                     | 94                     | 9.3                       | 13.5        |
|         | 50  | 839         | 1321       | 2637       | 0.7      | 2.0       | 19.5                     | 149                    | 10.3                      | 16.3        |
|         | 100 | 853         | 1341       | 2663       | 0.9      | 3.0       | 20.1                     | 203                    | 12.4                      | 16.6        |
| F0 P2   | 0   | 880         | 1502       | 2673       | 0.7      | 3.0       | 15.3                     | 104                    | 4.6                       | 13.4        |
|         | 50  | 880         | 1494       | 2679       | 0.5      | 2.0       | 17.4                     | 158                    | 4.0                       | 14.6        |
|         | 100 | 852         | 1510       | 2696       | 0.7      | 3.0       | 17.5                     | 213                    | 4.8                       | 15.1        |
| FF P1   | 0   | 648         | 1119       | 2239       | 0.5      | 2.0       | 20.7                     | 140                    | 10.1                      | 15.9        |
|         | 50  | 787         | 1237       | 2594       | 0.5      | 2.0       | 19.8                     | 140                    | 10.1                      | 15.3        |
|         | 100 | 968         | 1490       | 2947       | 0.4      | 1.0       | 19.8                     | 140                    | 10.3                      | 15.2        |
| FF P2   | 0   | 776         | 1365       | 2533       | 0.5      | 3.0       | 17.7                     | 140                    | 4.1                       | 14.4        |
|         | 50  | 923         | 1564       | 2771       | 0.5      | 2.0       | 16.6                     | 140                    | 4.1                       | 13.8        |
|         | 100 | 1005        | 1687       | 2912       | 0.5      | 4.0       | 15.2                     | 140                    | 4.1                       | 12.9        |
| SL P1   | 0   | 826         | 1353       | 2600       | 0.4      | 3.0       | 17.9                     | 140                    | 10.4                      | 12.7        |
|         | 50  | 861         | 1408       | 2528       | 0.5      | 2.0       | 20.2                     | 140                    | 10.1                      | 15.8        |
|         | 100 | 843         | 1397       | 2564       | 0.6      | 2.0       | 19.7                     | 140                    | 10.2                      | 17.0        |
| SL P2   | 0   | 892         | 1494       | 2602       | 0.5      | 3.0       | 15.0                     | 140                    | 4.0                       | 13.7        |
|         | 50  | 865         | 1500       | 2691       | 0.5      | 2.0       | 17.2                     | 140                    | 4.1                       | 14.2        |
|         | 100 | 849         | 1474       | 2710       | 0.7      | 2.0       | 17.0                     | 140                    | 4.1                       | 14.2        |
| AP P1   | 0   | 815         | 1348       | 2545       | 0.5      | 2.0       | 19.1                     | 140                    | 10.2                      | 14.1        |
|         | 50  | 815         | 1344       | 2534       | 0.5      | 1.0       | 20.1                     | 140                    | 10.1                      | 15.5        |
|         | 100 | 807         | 1337       | 2572       | 0.5      | 2.0       | 21.3                     | 140                    | 10.2                      | 16.2        |
| AP P2   | 0   | 863         | 1478       | 2523       | 0.6      | 4.0       | 15.5                     | 140                    | 4.0                       | 12.2        |
|         | 50  | 862         | 1484       | 2505       | 0.5      | 2.0       | 16.7                     | 140                    | 4.2                       | 14.5        |
|         | 100 | 860         | 1476       | 2471       | 0.6      | 2.0       | 16.7                     | 140                    | 4.1                       | 15.0        |
