# Supplementary material
Source: publisher figshare collection journal article supplement (https://asha.figshare.com/articles/dataset/_/6170438)
Supplement: Supplementary file 5 [file 1]

*Table E.* PSEs of individual listener data for both speaker pairs (P1, P2) and all morph types in Experiment 2. Values in parentheses were replaced by the mean of listener's data of the appropriate condition for the ANOVA

|            | P1    |        |          |          |       | P2      |        |        |          |       |
|------------|-------|--------|----------|----------|-------|---------|--------|--------|----------|-------|
|            | FOFF  | FOFFSL | FOSL     | FFSL     | Full  | FOFF    | FOFFSL | FOSL   | FFSL     | Full  |
| f201       | 36.72 | 30.59  | 35.28    | 36.90    | 35.47 | 27.86   | 23.65  | 18.05  | 8.80     | 23.44 |
| f202       | 63.91 | 59.38  | 77.53    | 79.98    | 57.20 | 34.16   | 40.83  | 42.47  | 43.83    | 39.76 |
| f203       | 52.18 | 48.69  | 66.60    | (121.80) | 59.04 | 47.91   | 43.64  | 48.02  | 77.32    | 50.41 |
| f204       | 49.79 | 45.96  | (105.40) | 32.99    | 41.53 | (21.78) | 33.43  | (29.0) | 14.86    | 45.47 |
| f206       | 57.02 | 54.20  | 72.29    | 116.40   | 60.11 | 53.93   | 49.25  | 56.46  | (122.0)  | 47.26 |
| f207       | 25.24 | 30.88  | 32.86    | 38.92    | 38.77 | 22.99   | 23.83  | 21.60  | 13.42    | 23.36 |
| f208       | 28.65 | 29.61  | 19.74    | -3.67    | 27.98 | 13.44   | 18.02  | 1.50   | (-3879)  | 9.54  |
| f209       | 66.92 | 64.48  | 80.39    | 71.00    | 53.47 | 37.79   | 31.54  | 44.69  | 44.57    | 36.89 |
| m212       | 32.78 | 27.66  | 30.70    | 22.99    | 30.00 | 28.78   | 33.39  | 35.00  | 17.09    | 26.83 |
| m213       | 29.93 | 24.04  | 36.60    | (-69.34) | 33.39 | 13.98   | 16.42  | 7.39   | ()       | 10.26 |
| m214       | 28.10 | 31.71  | 32.52    | 14.43    | 33.03 | 15.41   | 14.80  | 20.55  | 0.59     | 20.55 |
| m215       | 36.92 | 40.84  | 40.40    | 41.62    | 34.05 | 31.34   | 24.16  | 27.59  | 25.32    | 33.35 |
| m216       | 51.55 | 48.15  | 51.47    | 59.43    | 53.03 | 58.74   | 48.56  | 45.58  | 67.66    | 45.98 |
| m217       | 37.56 | 33.88  | 36.98    | 30.20    | 32.20 | 12.80   | 18.69  | 13.91  | (-184.0) | 16.50 |
| m218       | 33.34 | 34.79  | 39.28    | 41.98    | 39.39 | 39.86   | 28.60  | 34.89  | 35.65    | 35.42 |
| m219       | 37.34 | 38.15  | 48.32    | 55.56    | 45.53 | 28.13   | 25.07  | 26.84  | 20.82    | 30.79 |
| <i>M</i>   | 41.75 | 40.19  | 46.73    | 45.62    | 42.14 | 31.14   | 29.62  | 29.64  | 30.83    | 30.99 |
| <i>SD</i>  | 13.25 | 12.05  | 18.82    | 29.85    | 11.04 | 14.58   | 11.16  | 16.01  | 23.69    | 13.05 |
| <i>MIN</i> | 25.24 | 24.04  | 19.74    | -3.67    | 27.98 | 12.80   | 14.80  | 1.50   | 0.59     | 9.54  |
| <i>MAX</i> | 66.92 | 64.48  | 80.39    | 116.40   | 60.11 | 58.74   | 49.25  | 56.46  | 77.32    | 50.41 |
| <i>N</i>   | 16    | 16     | 15       | 14       | 16    | 15      | 16     | 15     | 12       | 16    |
