# Supplementary material
Source: publisher figshare collection journal article supplement (https://asha.figshare.com/articles/dataset/_/6170438)
Supplement: Supplementary file 6 [file 1]

*Table A.* Stimulus duration (d), mean  $f_0$ ,  $f_0$  variation ( $f_0SD$ ), and harmonics-to-noise ratio (HNR) measured over the whole utterance. Jitter (jit), shimmer (shim) and  $HNR_v$  were measured within a stable phase of the first vowel from 50 to 200 ms. Jitter (shimmer) is measured as the average absolute difference between consecutive periods (the amplitudes of consecutive periods), divided by the average period (amplitude), as defined in Praat software. All measurements were done before (pre) and after time standardization (post).

|           | pre          |      |         |                 |         |      |       |  | post         |      |         |                 |         |      |       |  |
|-----------|--------------|------|---------|-----------------|---------|------|-------|--|--------------|------|---------|-----------------|---------|------|-------|--|
|           | stable phase |      |         | whole utterance |         |      |       |  | stable phase |      |         | whole utterance |         |      |       |  |
|           | jit          | shim | $HNR_v$ | $f_0$           | $f_0SD$ | HNR  | d     |  | jit          | shim | $HNR_v$ | $f_0$           | $f_0SD$ | HNR  | d     |  |
|           | [%]          | [%]  | [dB]    | [Hz]            | [Hz]    | [dB] | [ms]  |  | [%]          | [%]  | dB      | [Hz]            | [Hz]    | [dB] | [ms]  |  |
| fDK       |              |      |         |                 |         |      |       |  |              |      |         |                 |         |      |       |  |
| aba       | 0.3          | 3.0  | 20.6    | 204             | 11.8    | 15.9 | 573   |  | 0.3          | 2.0  | 21.6    | 202             | 11.8    | 17.2 | 620   |  |
| aga       | 0.5          | 6.0  | 19.5    | 208             | 8.3     | 15.6 | 600   |  | 0.4          | 2.0  | 19.9    | 208             | 7.7     | 15.1 | 620   |  |
| ibi       | 0.5          | 4.0  | 24.6    | 216             | 10.4    | 19.4 | 550   |  | 0.5          | 2.0  | 26.5    | 215             | 11.4    | 21.4 | 620   |  |
| igi       | 0.3          | 3.0  | 27.8    | 224             | 5.6     | 24.2 | 566   |  | 0.4          | 2.0  | 27.5    | 224             | 4.9     | 24.6 | 620   |  |
| fEM       |              |      |         |                 |         |      |       |  |              |      |         |                 |         |      |       |  |
| aba       | 2.0          | 6.0  | 18.3    | 214             | 5.2     | 15.4 | 576   |  | 0.4          | 2.0  | 20.7    | 213             | 5.1     | 15.9 | 620   |  |
| aga       | 0.3          | 2.0  | 20.7    | 212             | 5.2     | 16.6 | 704   |  | 0.3          | 3.0  | 20.8    | 212             | 4.9     | 17.8 | 620   |  |
| ibi       | 0.3          | 5.0  | 26.8    | 218             | 5.7     | 21.2 | 692   |  | 0.3          | 2.0  | 26.5    | 219             | 4.9     | 22.1 | 620   |  |
| igi       | 0.5          | 2.0  | 23.8    | 220             | 6.4     | 20.6 | 623   |  | 0.5          | 2.0  | 23.6    | 219             | 6.1     | 21.2 | 620   |  |
| mJN       |              |      |         |                 |         |      |       |  |              |      |         |                 |         |      |       |  |
| aba       | 0.8          | 5.0  | 13.2    | 104             | 4.7     | 13.2 | 667   |  | 0.4          | 3.0  | 16.1    | 104             | 4.8     | 13.5 | 620   |  |
| aga       | 0.6          | 4.0  | 13.2    | 104             | 7.0     | 11.6 | 713   |  | 0.7          | 4.0  | 14.1    | 104             | 7.3     | 12.6 | 620   |  |
| ibi       | 0.3          | 4.0  | 22.4    | 117             | 24.5    | 15.4 | 711   |  | 0.5          | 4.0  | 21.7    | 113             | 11.3    | 15.8 | 620   |  |
| igi       | 0.4          | 4.0  | 24.7    | 125             | 18.0    | 16.3 | 800   |  | 0.4          | 4.0  | 24.3    | 125             | 8.4     | 18.1 | 620   |  |
| mUA       |              |      |         |                 |         |      |       |  |              |      |         |                 |         |      |       |  |
| aba       | 0.9          | 4.0  | 13.4    | 94              | 8.8     | 10.2 | 631   |  | 0.6          | 9.0  | 16.5    | 95              | 9.4     | 11.1 | 620   |  |
| aga       | 2.0          | 7.0  | 9.1     | 89              | 8.9     | 11.7 | 682   |  | 2.0          | 6.0  | 9.1     | 90              | 9.2     | 11.6 | 620   |  |
| ibi       | 2.0          | 4.0  | 22.2    | 96              | 12.5    | 14.7 | 614   |  | 0.5          | 5.0  | 22.7    | 97              | 12.8    | 15.0 | 620   |  |
| igi       | 1.0          | 7.0  | 20.5    | 97              | 13.0    | 14.6 | 733   |  | 0.6          | 4.0  | 22.7    | 99              | 14.8    | 16.6 | 620   |  |
| female    |              |      |         |                 |         |      |       |  |              |      |         |                 |         |      |       |  |
| <i>M</i>  | 0.6          | 3.9  | 22.8    | 214.6           | 7.3     | 18.6 | 610.5 |  | 0.4          | 2.1  | 23.4    | 214.0           | 7.1     | 19.4 | 620.0 |  |
| <i>SD</i> | 0.6          | 1.6  | 3.5     | 6.7             | 2.6     | 3.2  | 58.2  |  | 0.1          | 0.4  | 3.1     | 7.0             | 2.9     | 3.4  | 0.0   |  |
| male      |              |      |         |                 |         |      |       |  |              |      |         |                 |         |      |       |  |
| <i>M</i>  | 1.5          | 5.5  | 16.3    | 94.1            | 10.8    | 12.8 | 665.3 |  | 0.9          | 6.0  | 17.7    | 95.0            | 11.5    | 13.6 | 620.0 |  |
| <i>SD</i> | 0.7          | 1.4  | 5.7     | 12.2            | 6.4     | 2.2  | 59.3  |  | 0.5          | 1.9  | 5.3     | 11.3            | 3.1     | 2.5  | 0.0   |  |
| overall   |              |      |         |                 |         |      |       |  |              |      |         |                 |         |      |       |  |
| <i>M</i>  | 0.8          | 4.4  | 20.0    | 158.9           | 9.7     | 16.0 | 652.3 |  | 0.6          | 3.5  | 20.9    | 158.6           | 8.4     | 16.8 | 620.0 |  |
| <i>SD</i> | 0.6          | 1.5  | 5.4     | 58.2            | 5.3     | 3.8  | 71.3  |  | 0.4          | 1.9  | 4.9     | 57.9            | 3.2     | 3.9  | 0.0   |  |
