# Supplementary material
Source: publisher figshare collection journal article supplement (https://asha.figshare.com/articles/dataset/_/6170438)
Supplement: Supplementary file 7 [file 1]

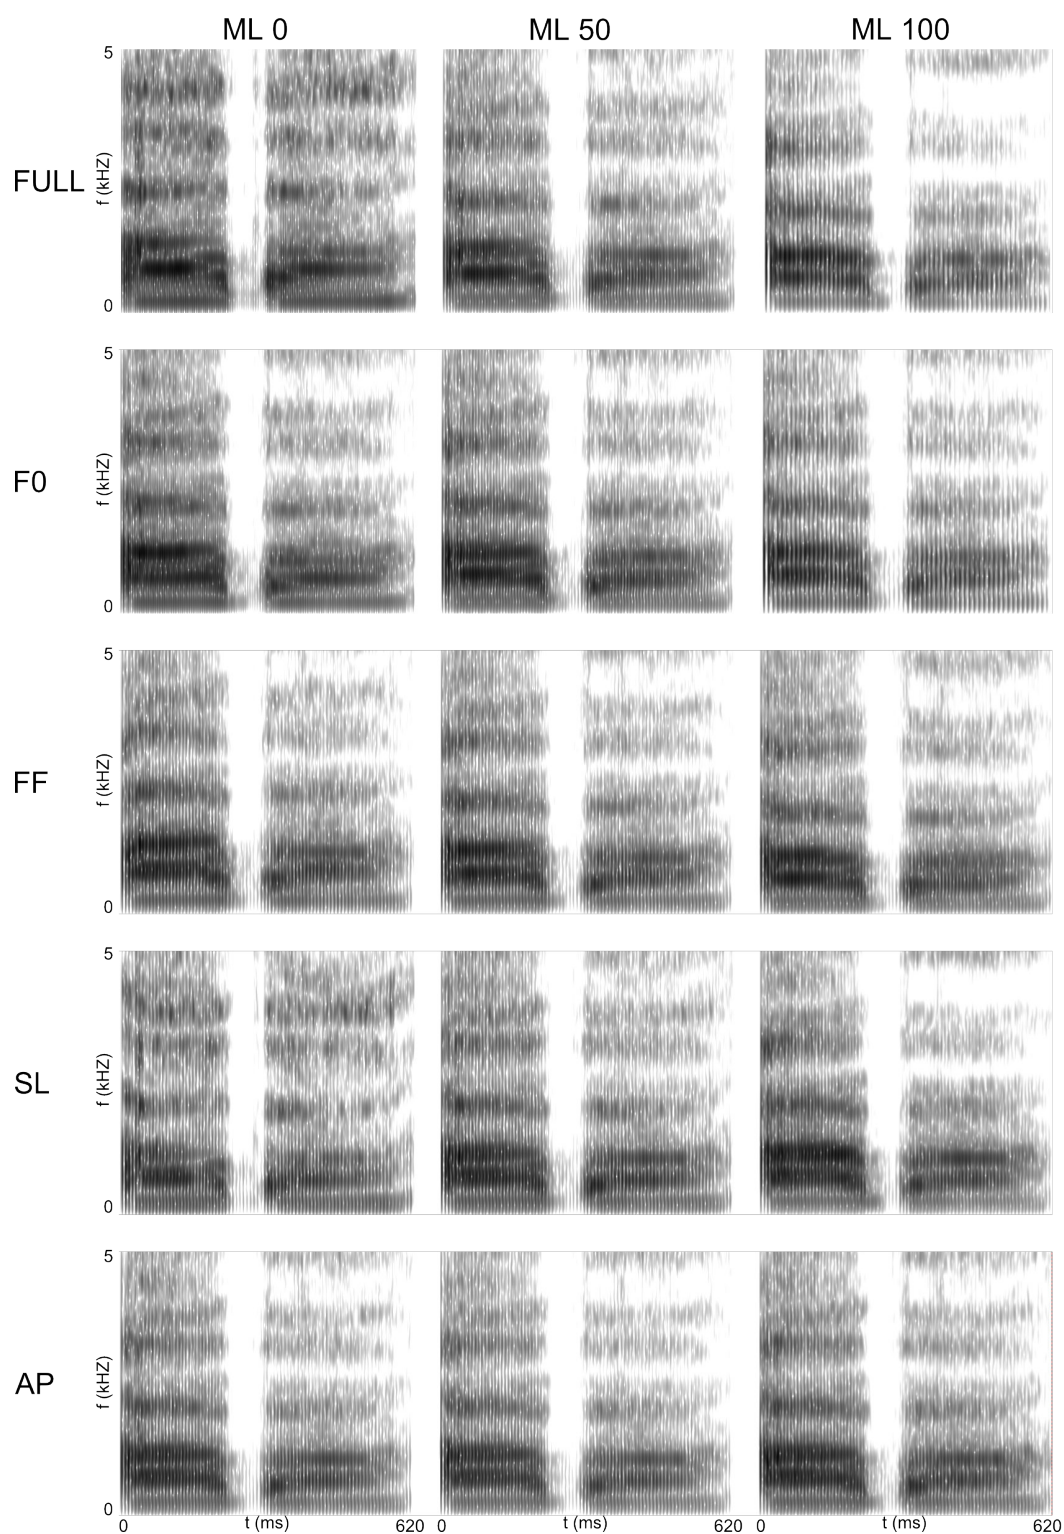

*Figure 2.* Spectrograms of single parameter morphs for /aba/ of speaker pair P2 in Experiment 1. Rows: Morph types (Full, F0, FF, SL, AP). Columns: Selected morph levels (ML0, ML50, ML100).
