# Supplementary material
Source: publisher figshare collection journal article supplement (https://asha.figshare.com/articles/dataset/_/6170438)
Supplement: Supplementary file 8 [file 1]

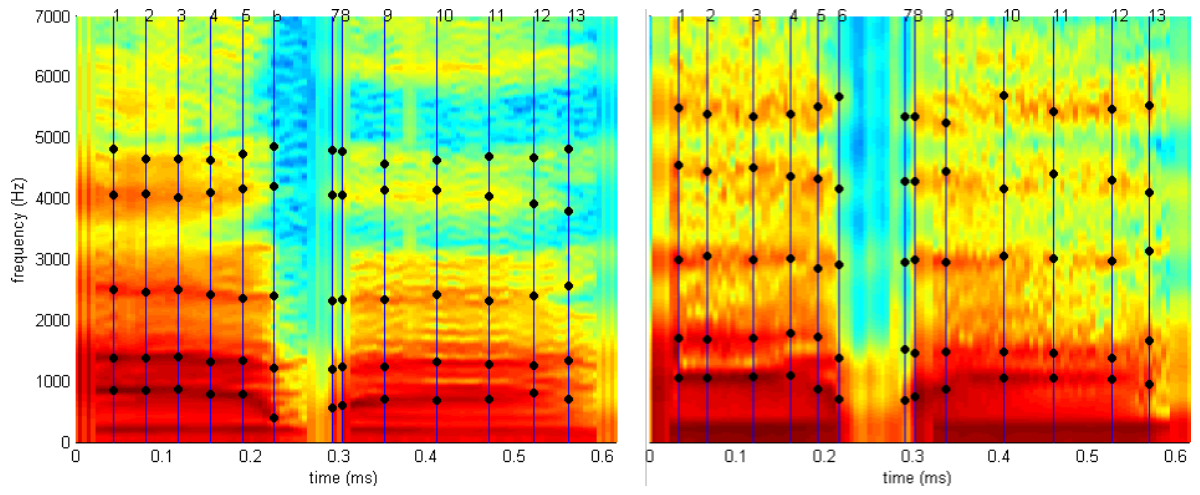

*Figure 1.* Example spectrograms of utterance /aba/ with time and frequency anchors of speaker pair P2. Left: male speaker mJN. Right: female spaker fEM.
