# Supplementary material
Source: publisher figshare collection journal article supplement (https://asha.figshare.com/articles/dataset/_/6170438)
Supplement: Supplementary file 9 [file 1]

*Table F.* Slope (SD) values of individual listener data for both speaker pairs (P1, P2) and all morph types in Experiment 2. Values in parentheses were replaced by the mean of listener's data of the appropriate condition for the ANOVA.

|            | P1    |        |          |          |       | P2      |        |         |          |       |
|------------|-------|--------|----------|----------|-------|---------|--------|---------|----------|-------|
|            | FOFF  | FOFFSL | FOSL     | FFSL     | Full  | FOFF    | FOFFSL | FOSL    | FFSL     | Full  |
| f201       | 13.26 | 1.93   | 12.72    | 26.71    | 7.68  | 10.27   | 5.39   | 1.66    | 28.67    | 8.44  |
| f202       | 12.10 | 15.69  | 17.75    | 29.41    | 8.75  | 14.30   | 21.03  | 17.71   | 33.93    | 11.43 |
| f203       | 13.37 | 14.19  | 26.57    | (80.82)  | 17.42 | 16.23   | 23.92  | 19.91   | 54.38    | 12.41 |
| f204       | 43.32 | 37.49  | (198.70) | 52.02    | 28.30 | (46.92) | 54.74  | (80.70) | 54.72    | 48.81 |
| f206       | 9.85  | 14.84  | 13.28    | 46.17    | 9.40  | 13.35   | 1.35   | 8.53    | (64.31)  | 10.65 |
| f207       | 17.25 | 16.62  | 13.40    | 36.89    | 10.76 | 13.48   | 19.13  | 10.10   | 31.00    | 8.91  |
| f208       | 1.25  | 0.58   | 11.74    | 11.23    | 1.72  | 8.45    | 1.68   | 13.89   | (512.0)  | 1.40  |
| f209       | 18.24 | 15.85  | 40.59    | 36.38    | 17.02 | 16.20   | 24.01  | 53.04   | 41.85    | 23.92 |
| m212       | 8.47  | 6.55   | 7.00     | 9.87     | 0.36  | 13.12   | 12.36  | 4.71    | 55.40    | 7.70  |
| m213       | 8.60  | 8.38   | 26.57    | (258.00) | 25.29 | 9.91    | 32.51  | 24.93   | ()       | 16.67 |
| m214       | 9.05  | 12.03  | 10.92    | 25.43    | 6.61  | 8.45    | 13.26  | 10.35   | 1.94     | 10.35 |
| m215       | 11.15 | 1.91   | 12.94    | 51.87    | 13.56 | 12.50   | 18.62  | 17.15   | 103.30   | 14.07 |
| m216       | 12.21 | 11.06  | 12.54    | 18.93    | 6.61  | 34.76   | 13.46  | 23.15   | 32.40    | 10.11 |
| m217       | 6.85  | 9.57   | 22.22    | 26.03    | 6.65  | 8.75    | 13.43  | 9.95    | (220.70) | 17.33 |
| m218       | 10.64 | 4.48   | 11.50    | 20.42    | 6.81  | 22.81   | 4.97   | 4.35    | 25.53    | 8.59  |
| m219       | 14.73 | 8.35   | 23.01    | 44.10    | 16.37 | 17.93   | 10.87  | 20.89   | 52.66    | 14.37 |
| <i>M</i>   | 13.15 | 11.22  | 17.52    | 31.10    | 11.46 | 14.70   | 16.92  | 16.02   | 42.98    | 14.07 |
| <i>SD</i>  | 9.02  | 8.78   | 8.77     | 13.91    | 7.77  | 6.81    | 13.27  | 12.48   | 24.65    | 10.53 |
| <i>MIN</i> | 1.25  | 0.58   | 7.00     | 9.87     | 0.36  | 8.45    | 1.35   | 1.66    | 1.94     | 1.40  |
| <i>MAX</i> | 43.32 | 37.49  | 40.59    | 52.02    | 28.30 | 34.76   | 54.74  | 53.04   | 103.30   | 48.81 |
| <i>N</i>   | 16    | 16     | 15       | 14       | 16    | 15      | 16     | 15      | 12       | 16    |
