# Supplementary material
Source: publisher figshare collection journal article supplement (https://asha.figshare.com/articles/dataset/_/6170438)
Supplement: Supplementary file 10 [file 1]

Table C.  $R^2$ , PSE, and slope (SD) values of individual listeners for F0 and Full morphs of per speaker pair in Experiment 1.

|            | $R^2$             |                    |                    |                   | PSE     |       |       |       | SD      |       |       |       |
|------------|-------------------|--------------------|--------------------|-------------------|---------|-------|-------|-------|---------|-------|-------|-------|
|            | P1                |                    | P2                 |                   | P1      |       | P2    |       | P1      |       | P2    |       |
|            | F0                | Full               | F0                 | Full              | F0      | Full  | F0    | Full  | F0      | Full  | F0    | Full  |
| 101        | .744              | .933               | .931               | .907              | 66.65   | 53.39 | 56.04 | 39.72 | 21.73   | 21.53 | 31.26 | 13.90 |
| 102        | .404 <sup>b</sup> | .819               | .710               | .983              | (111.5) | 60.77 | 73.05 | 53.78 | (72.27) | 24.30 | 57.90 | 15.53 |
| 103        | .859              | .992 <sup>a</sup>  | .933               | .964 <sup>a</sup> | 54.20   | 41.18 | 31.56 | 38.03 | 24.24   | 1.75  | 14.51 | 1.68  |
| 104        | .952              | .934               | .960               | .987              | 52.17   | 49.75 | 50.21 | 44.64 | 17.52   | 10.36 | 17.94 | 8.31  |
| 105        | .944              | .997               | .858               | .968              | 33.06   | 31.09 | -0.22 | 19.95 | 24.75   | 10.66 | 33.34 | 14.58 |
| 106        | .893              | .979               | .953               | .956              | 76.94   | 63.46 | 87.09 | 60.54 | 19.08   | 8.52  | 25.67 | 17.61 |
| 107        | .888              | .986               | .789               | .908              | 21.28   | 28.61 | 5.70  | 12.37 | 5.20    | 4.59  | 24.77 | 7.26  |
| 108        | .946              | .964               | .836               | .940              | 84.02   | 72.51 | 81.64 | 61.23 | 33.27   | 26.58 | 31.28 | 11.62 |
| 121        | .910              | .994               | .912               | .985              | 61.79   | 53.58 | 61.58 | 48.91 | 11.70   | 5.80  | 29.01 | 11.88 |
| 122        | .849              | .932               | .941               | .853              | 29.45   | 35.93 | 20.51 | 17.05 | 18.50   | 9.55  | 17.26 | 9.99  |
| 123        | .943              | .966               | .755               | .986              | 44.35   | 34.41 | 44.19 | 43.62 | 27.26   | 12.90 | 47.48 | 20.58 |
| 124        | .989              | .990               | .994               | 1.000             | 20.00   | 23.65 | 8.06  | 10.00 | 1.98    | 5.39  | 8.04  | 0.36  |
| 125        | .966 <sup>a</sup> | .994 <sup>a</sup>  | .981               | .987              | 41.92   | 40.57 | 35.29 | 36.20 | 1.71    | 1.87  | 17.50 | 6.78  |
| 126        | .964              | int. <sup>c</sup>  | .853               | .999              | 58.15   | 51.40 | 55.00 | 47.02 | 11.06   | 1.24  | 15.08 | 9.85  |
| 127        | .755              | .819               | .550               | .944              | 83.10   | 52.03 | 34.31 | 37.64 | 54.19   | 25.28 | 44.79 | 23.85 |
| 128        | .993 <sup>a</sup> | 1.000 <sup>a</sup> | 1.000 <sup>a</sup> | .990              | 21.86   | 28.65 | 20.75 | 21.71 | 1.65    | 1.254 | 1.35  | 3.09  |
| <i>M</i>   | .875              | .953               | .872               | .960              | 49.93   | 45.06 | 41.55 | 37.03 | 18.26   | 10.72 | 26.07 | 11.05 |
| <i>SD</i>  | .146              | .059               | .122               | .041              | 21.30   | 14.18 | 26.79 | 16.40 | 13.59   | 8.96  | 14.94 | 6.57  |
| <i>MIN</i> | .404              | .819               | .550               | .853              | 20.00   | 23.65 | -0.22 | 10.00 | 1.65    | 1.24  | 1.35  | 0.37  |
| <i>MAX</i> | .993              | 1.000              | 1.000              | 1.000             | 84.02   | 72.51 | 87.09 | 61.23 | 54.19   | 26.58 | 57.90 | 23.85 |
| <i>N</i>   | 16                | 15                 | 16                 | 16                | 15      | 16    | 16    | 16    | 15      | 16    | 16    | 16    |

<sup>a</sup>)  $R^2$  result from ambiguous fits; <sup>b</sup>) poor fit ( $R^2 < .5$ ) with corresponding PSE and SD value (in parentheses) replaced by the mean of listener's data of the appropriate condition for the ANOVA; <sup>c</sup>) One fit computation interrupted (int.), resulting in an approximated PSE but no  $R^2$ .
