# Supplementary material
Source: publisher figshare collection journal article supplement (https://asha.figshare.com/articles/dataset/_/6170438)
Supplement: Supplementary file 11 [file 1]

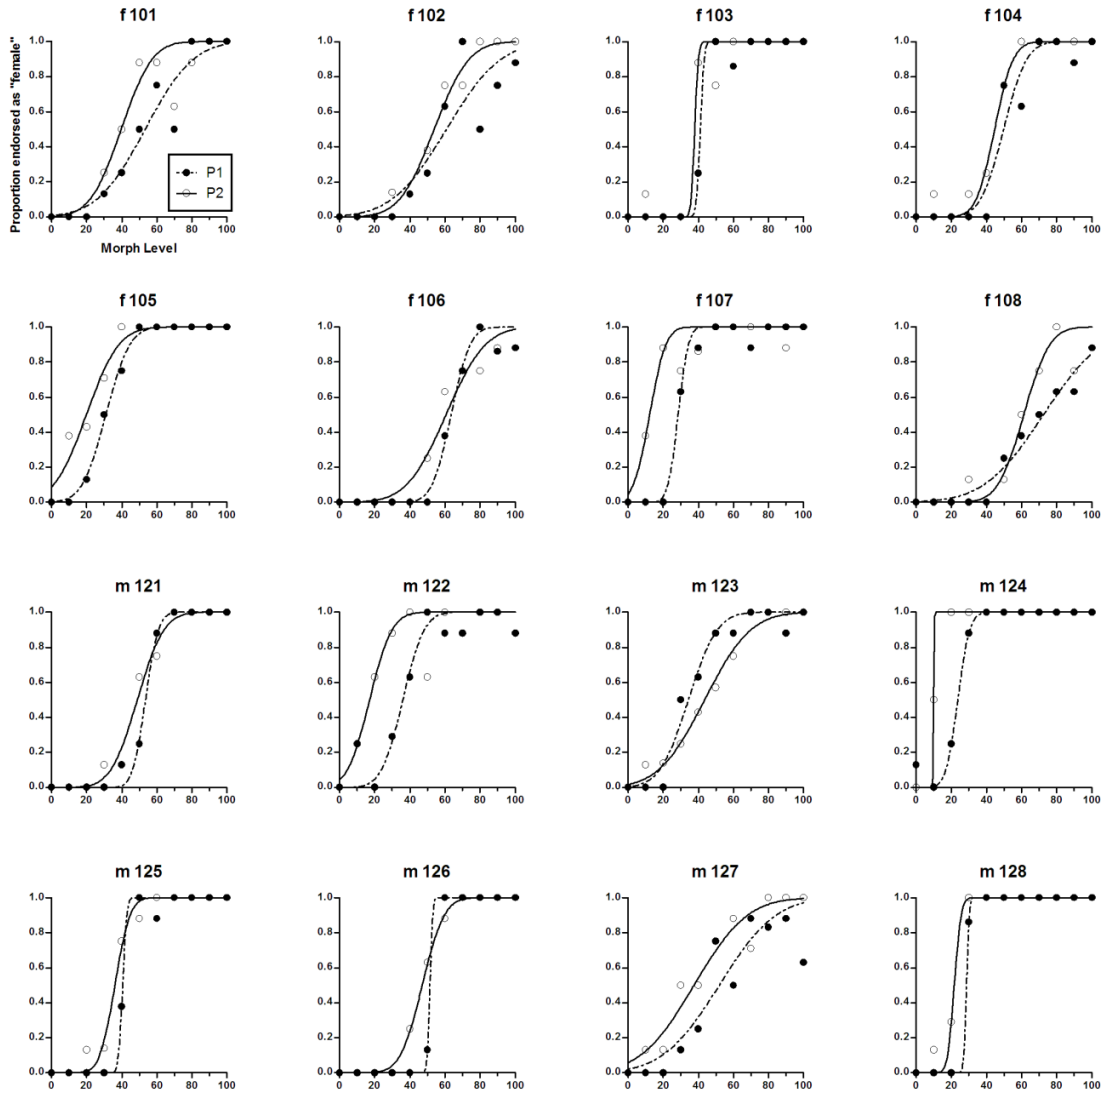

*Figure 4.* Individual cumulative Gaussian fits for Full morphs of speaker pairs P1 and P2 averaged across syllables of Experiment 1.
